# Supplementary material
Source: PubMed Central journal article supplement (PMC10928907)
Supplement: NIHMS1973026-supplement-1.pdf [file NIHMS1973026-supplement-1.pdf]

**Supplementary Table 1**  
Cohort Selection

| Criteria                                                            | 2011, no. of subjects | 2012, no. of subjects | 2013, no. of subjects | 2014, no. of subjects | 2015, no. of subjects | 2016            |                    |
|---------------------------------------------------------------------|-----------------------|-----------------------|-----------------------|-----------------------|-----------------------|-----------------|--------------------|
|                                                                     |                       |                       |                       |                       |                       | No. of Subjects | % of Previous Step |
| 1-year Fee-for-Service (FFS) enrollment                             | 2,101,257             | 2,093,624             | 2,030,574             | 2,047,235             | 1,999,812             | 2,016,997       |                    |
| At least 1 MDS assessment                                           | 104,977               | 107,682               | 119,210               | 120,132               | 109,415               | 111,581         | 5.5                |
| At least 1 qualified episode (120 d)*                               | 54,543                | 56,250                | 63,877                | 63,342                | 52,670                | 47,631          | 42.7               |
| Complete assessment on diagnosis and cognitive function†            | 54,212                | 55,847                | 63,427                | 62,921                | 52,334                | 47,397          | 99.5               |
| Active diagnosis as Alzheimer's disease or non-Alzheimer's dementia | 32,769                | 34,869                | 40,082                | 40,151                | 32,506                | 30,405          | 64.1               |
| Severe cognitive impairment                                         | 6235                  | 6190                  | 6609                  | 6285                  | 4753                  | 4576            | 15.1               |
| Complete nutrition assessment on feeding tube                       | 6234                  | 6188                  | 6599                  | 6282                  | 4750                  | 4575            |                    |

MDS, Minimum Data Set.

\*The duration of stay in skilled nursing home was not counted as part of facility stay, and the first episode in a calendar year was selected.

†The first MDS assessment during episode was selected.

**Supplementary Table 2**

Compare the Characteristics and Mortality Between Subjects With Only 1-Year Eligibility and With &gt;1 Year

| Variable                           | Only 1-y Eligibility, n (%)<br>(n = 12,447) | >1 y Eligibility,* n (%)<br>(n = 8135) | P Value |
|------------------------------------|---------------------------------------------|----------------------------------------|---------|
| Age, y                             |                                             |                                        | <.001   |
| <65                                | 714 (5.7)                                   | 611 (7.5)                              |         |
| 66–75                              | 1751 (14.1)                                 | 1442 (17.7)                            |         |
| 76–85                              | 4545 (36.5)                                 | 3296 (40.5)                            |         |
| >85                                | 5437 (43.7)                                 | 2786 (34.2)                            |         |
| Gender                             |                                             |                                        | <.001   |
| Male                               | 3581 (28.8)                                 | 1892 (23.3)                            |         |
| Female                             | 8866 (71.2)                                 | 6243 (76.7)                            |         |
| Race                               |                                             |                                        | <.001   |
| Non-Hispanic white                 | 2291 (18.4)                                 | 1554 (19.1)                            |         |
| Non-Hispanic black                 | 8275 (66.5)                                 | 5209 (64.0)                            |         |
| Hispanic                           | 1427 (11.5)                                 | 1116 (13.7)                            |         |
| Other                              | 454 (3.6)                                   | 256 (3.1)                              |         |
| Marital status                     |                                             |                                        | .007    |
| Married                            | 3394 (27.3)                                 | 2341 (28.8)                            |         |
| Widowed                            | 6478 (52.0)                                 | 4053 (49.8)                            |         |
| Other                              | 2575 (20.7)                                 | 1741 (21.4)                            |         |
| Primary care provider              |                                             |                                        | .09     |
| <2 times in a year                 | 1269 (10.2)                                 | 889 (10.9)                             |         |
| Physician                          | 7595 (61.0)                                 | 5017 (61.7)                            |         |
| NP or PA                           | 3583 (28.8)                                 | 2229 (27.4)                            |         |
| Active diagnosis at initial MDS    |                                             |                                        |         |
| Anemia                             | 3273 (26.3)                                 | 2129 (26.2)                            | .84     |
| Heart failure                      | 1928 (15.5)                                 | 957 (11.8)                             | <.001   |
| Hypertension                       | 9147 (73.5)                                 | 5652 (69.5)                            | <.001   |
| PVD or PAD                         | 623 (5.0)                                   | 252 (3.1)                              | <.001   |
| Urinary tract infection            | 1285 (10.3)                                 | 858 (10.5)                             | .61     |
| Diabetes                           | 3332 (26.8)                                 | 1941 (23.9)                            | <.001   |
| Thyroid disorder                   | 1089 (8.7)                                  | 605 (7.4)                              | <.001   |
| Arthritis                          | 943 (7.6)                                   | 576 (7.1)                              | .18     |
| Osteoporosis                       | 745 (6.0)                                   | 463 (5.7)                              | .38     |
| Stroke                             | 2301 (18.5)                                 | 1473 (18.1)                            | .49     |
| Anxiety                            | 4084 (32.8)                                 | 2671 (32.8)                            | .97     |
| Depression                         | 6409 (51.5)                                 | 4225 (51.9)                            | .53     |
| Asthma                             | 1437 (11.5)                                 | 674 (8.3)                              | <.001   |
| Mortality                          |                                             |                                        | <.001   |
| Alive in the end of study          | 3598 (28.9)                                 | 3056 (37.6)                            |         |
| Death during 2011 and 2016         | 8849 (71.1)                                 | 5079 (62.4)                            |         |
| Nursing home location <sup>†</sup> |                                             |                                        | <.001   |
| Health service region              |                                             |                                        |         |
| Region 1 (Lubbock)                 | 485 (3.9)                                   | 284 (3.5)                              |         |
| Region 2/3 (Arlington)             | 3799 (30.7)                                 | 2323 (28.8)                            |         |
| Region 4/5N (Tyler)                | 1406 (11.4)                                 | 1081 (13.4)                            |         |
| Region 6/5S (Houston)              | 2005 (16.2)                                 | 1160 (14.4)                            |         |
| Region 7 (Temple)                  | 1596 (12.9)                                 | 1116 (13.8)                            |         |
| Region 8 (San Antonio)             | 1464 (11.8)                                 | 947 (11.7)                             |         |
| Region 9/10 (El Paso)              | 619 (5.0)                                   | 335 (4.2)                              |         |
| Region 11 (Harlingen)              | 987 (8.0)                                   | 823 (10.2)                             |         |
| Metro area                         |                                             |                                        | <.001   |
| Metro                              | 9137 (73.9)                                 | 5683 (70.4)                            |         |
| Nonmetro                           | 3224 (26.1)                                 | 2386 (29.6)                            |         |
| Border area                        |                                             |                                        | .002    |
| Border                             | 965 (7.8)                                   | 729 (9.0)                              |         |
| Nonborder                          | 11,396 (92.2)                               | 7340 (91.0)                            |         |

NP, nurse practitioner; PA, physician assistant; PAD, peripheral arterial disease; PVD, peripheral vascular disease.

\*Assessment from the first eligible episode.

<sup>†</sup>There were 152 subjects without facility address. County of facility location was used to define region, metro, and border (La Paz Agreement).

**Supplementary Table 3**

## Algorithm to Determine Primary Care Visit and Primary Care Provider

| Measure                          | Algorithm                                                                                                                                                                              |
|----------------------------------|----------------------------------------------------------------------------------------------------------------------------------------------------------------------------------------|
| Primary care visit               | CPT code: 99201-99215, 99304-99350, 99363-99449, 99487-99490, 99495-99498, 98966-98969, G0463, G0438, G0439                                                                            |
| Primary care physician           | CMS provider specialty codes: general practice (01), family practice (08), internal medicine (11), geriatric medicine (38)                                                             |
| Primary care nurse practitioner  | CMS provider specialty codes as nurse practitioner (50), and taxonomy code as primary care nurse practitioner (363L00000X, 363LA2200X, 363LF0000X, 363LG0600X, 363LP2300X, 363LW0102X) |
| Primary care physician assistant | CMS provider specialty codes as physician assistant (97) and taxonomy as physician assistant (363A00000X, 363AM0700X).                                                                 |

CMS, Centers for Medicare & Medicaid Services; CPT, Current Procedural Terminology.

**Supplementary Table 4**

Adjusted Prevalence Ratio Estimation on Feeding Tube Insertion Stratified by Year of Eligibility

| Variable                          | 1 y* PR (95% CI)              | >1 y* PR (95% CI)             |
|-----------------------------------|-------------------------------|-------------------------------|
| <b>Year of residency</b>          |                               |                               |
| 2011                              | Ref                           | Ref                           |
| 2012                              | 0.92 (0.78-1.09) <sup>†</sup> | 1.17 (1.09-1.25) <sup>†</sup> |
| 2013                              | 0.90 (0.75-1.08) <sup>†</sup> | 1.33 (1.22-1.45) <sup>†</sup> |
| 2014                              | 0.83 (0.70-0.98) <sup>†</sup> | 1.39 (1.28-1.52) <sup>†</sup> |
| 2015                              | 0.68 (0.55-0.82) <sup>†</sup> | 1.48 (1.35-1.63) <sup>†</sup> |
| 2016                              | 0.71 (0.60-0.85) <sup>†</sup> | 1.62 (1.46-1.78) <sup>†</sup> |
| <b>Age, y</b>                     |                               |                               |
| <65                               | Ref                           | Ref                           |
| 66-75                             | 0.74 (0.60-0.90) <sup>†</sup> | 0.80 (0.68-0.93) <sup>†</sup> |
| 76-85                             | 0.56 (0.45-0.68) <sup>†</sup> | 0.67 (0.57-0.79) <sup>†</sup> |
| >85                               | 0.49 (0.39-0.61) <sup>†</sup> | 0.64 (0.54-0.76) <sup>†</sup> |
| <b>Gender</b>                     |                               |                               |
| Male                              | Ref                           | Ref                           |
| Female                            | 0.97 (0.86-1.08)              | 0.95 (0.84-1.07)              |
| <b>Race</b>                       |                               |                               |
| Non-Hispanic white                | Ref                           | Ref                           |
| Non-Hispanic black                | 2.66 (2.32-3.03) <sup>†</sup> | 2.77 (2.39-3.19) <sup>†</sup> |
| Hispanic                          | 1.88 (1.61-2.19) <sup>†</sup> | 2.00 (1.72-2.31) <sup>†</sup> |
| Other                             | 2.49 (1.99-3.08) <sup>†</sup> | 1.70 (1.47-1.96) <sup>†</sup> |
| <b>Marital status</b>             |                               |                               |
| Married                           | Ref                           | Ref                           |
| Widowed                           | 0.84 (0.73-0.96) <sup>†</sup> | 0.90 (0.80-1.02)              |
| Other                             | 0.95 (0.82-1.09)              | 0.97 (0.85-1.11)              |
| <b>Comorbidity</b>                |                               |                               |
| Without disease                   | Ref                           | Ref                           |
| Anemia                            | 1.27 (1.14-1.42) <sup>†</sup> | 1.15 (1.07-1.24) <sup>†</sup> |
| Heart Failure                     | 1.08 (0.93-1.24)              | 1.11 (1.00-1.24)              |
| Hypertension                      | 0.98 (0.86-1.12)              | 1.01 (0.94-1.09)              |
| PVD or PAD                        | 1.00 (0.80-1.25)              | 1.11 (0.98-1.24)              |
| Urinary tract infection           | 1.31 (1.12-1.52) <sup>†</sup> | 1.18 (1.09-1.27) <sup>†</sup> |
| Diabetes                          | 1.38 (1.24-1.54) <sup>†</sup> | 1.33 (1.20-1.48) <sup>†</sup> |
| Thyroid disorder                  | 1.24 (1.03-1.49) <sup>†</sup> | 1.06 (0.96-1.17)              |
| Arthritis                         | 0.78 (0.62-0.98) <sup>†</sup> | 0.99 (0.89-1.11)              |
| Osteoporosis                      | 0.79 (0.60-1.03)              | 1.11 (1.00-1.23)              |
| Stroke                            | 2.49 (2.25-2.74) <sup>†</sup> | 1.43 (1.31-1.57) <sup>†</sup> |
| Anxiety                           | 0.85 (0.75-0.96) <sup>†</sup> | 0.94 (0.88-1.00)              |
| Depression                        | 0.67 (0.60-0.75) <sup>†</sup> | 0.84 (0.79-0.89) <sup>†</sup> |
| Asthma                            | 1.20 (1.03-1.40) <sup>†</sup> | 1.09 (0.97-1.23)              |
| <b>Provider type</b>              |                               |                               |
| MD                                | Ref                           | Ref                           |
| NP/PA                             | 0.93 (0.82-1.05)              | 0.90 (0.84-0.96) <sup>†</sup> |
| <b>Ownership<sup>‡</sup></b>      |                               |                               |
| Profit                            | Ref                           | Ref                           |
| Nonprofit/government              | 0.93 (0.79-1.08)              | 0.95 (0.89-1.01)              |
| <b>Quality<sup>§</sup></b>        |                               |                               |
| Rank 1-3                          | Ref                           | Ref                           |
| Good (5-star rank >3)             | 0.99 (0.88-1.11)              | 1.04 (0.98-1.09)              |
| <b>RN staffing<sup>§</sup></b>    |                               |                               |
| ≤Median                           | Ref                           | Ref                           |
| >Median                           | 1.17 (1.05-1.29) <sup>†</sup> | 1.01 (0.96-1.06)              |
| <b>Total staffing<sup>§</sup></b> |                               |                               |
| ≤Median                           | Ref                           | Ref                           |
| >Median                           | 0.94 (0.85-1.05)              | 1.03 (0.98-1.08)              |
| <b>Certified beds<sup>§</sup></b> |                               |                               |
| 100                               | Ref                           | Ref                           |
| 100-200                           | 1.05 (0.92-1.20)              | 1.07 (0.97-1.18)              |
| >200                              | 0.87 (0.65-1.15)              | 1.03 (0.85-1.24)              |
| <b>Health service region</b>      |                               |                               |
| Temple                            | Ref                           | Ref                           |
| Lubbock                           | 1.00 (0.64-1.55)              | 0.71 (0.43-1.16)              |
| Arlington                         | 1.30 (1.03-1.62) <sup>†</sup> | 1.25 (1.01-1.55) <sup>†</sup> |
| Tyler                             | 1.90 (1.47-2.44) <sup>†</sup> | 1.36 (1.05-1.73) <sup>†</sup> |
| Houston                           | 2.12 (1.71-2.61) <sup>†</sup> | 2.19 (1.78-2.67) <sup>†</sup> |
| San Antonio (border)              | 3.62 (2.43-5.13) <sup>†</sup> | 4.46 (3.20-5.83) <sup>†</sup> |
| San Antonio (not border)          | 1.54 (1.19-1.99) <sup>†</sup> | 1.47 (1.13-1.89) <sup>†</sup> |
| El Paso (border)                  | 2.26 (1.53-3.25) <sup>†</sup> | 1.78 (1.14-2.68) <sup>†</sup> |
| El Paso (not border)              | 1.04 (0.65-1.64)              | 0.44 (0.22-0.85) <sup>†</sup> |

(continued)

**Supplementary Table 4 (continued)**

| Variable               | 1 y* PR (95% CI)              | >1 y* PR (95% CI)             |
|------------------------|-------------------------------|-------------------------------|
| Harlingen (border)     | 4.95 (4.01-5.99) <sup>†</sup> | 3.88 (3.15-4.67) <sup>†</sup> |
| Harlingen (not border) | 2.09 (1.48-2.89) <sup>†</sup> | 1.96 (1.43-2.63) <sup>†</sup> |
| Metro county           | 1.26 (1.07-1.48) <sup>†</sup> | 1.44 (1.25-1.66) <sup>†</sup> |

CI, confidence interval; NP, nurse practitioner; PA, physician assistant; PAD, peripheral arterial disease; PR, prevalence ratio; PVD, peripheral vascular disease; Ref, referent; RN, registered nurse.

\*Full model was applied.

<sup>†</sup>P < .05.

<sup>‡</sup>Ownership status in corresponding study year.

<sup>§</sup>Average of 4 quarterly assessments in corresponding study year. For 2013, the facility without quarterly report was determined with an average of 6 monthly assessments (July-December).
